# Supplementary material for: Effect of perioperative intravenous lidocaine on postoperative outcomes in patients undergoing resection of colorectal cancer: a protocol for systematic review and meta-analysis
Source: PubMed Central journal article supplement — BMJ Open. 2021 Aug 23;11(8):e048803. doi: 10.1136/bmjopen-2021-048803 (PMC8383864; doi:10.1136/bmjopen-2021-048803), 2021-08-23
Supplement: bmjopen-2021-048803.draft_revisions.pdf [file bmjopen-2021-048803.draft_revisions.pdf]

# BMJ Open

BMJ Open is committed to open peer review. As part of this commitment we make the peer review history of every article we publish publicly available.

When an article is published we post the peer reviewers' comments and the authors' responses online. We also post the versions of the paper that were used during peer review. These are the versions that the peer review comments apply to.

The versions of the paper that follow are the versions that were submitted during the peer review process. They are not the versions of record or the final published versions. They should not be cited or distributed as the published version of this manuscript.

BMJ Open is an open access journal and the full, final, typeset and author-corrected version of record of the manuscript is available on our site with no access controls, subscription charges or pay-per-view fees (<http://bmjopen.bmj.com>).

If you have any questions on BMJ Open's open peer review process please email [info.bmjopen@bmj.com](mailto:info.bmjopen@bmj.com)

# BMJ Open

## Effect of perioperative intravenous lidocaine on postoperative outcomes in patients undergoing resection of colorectal cancer: a protocol for systematic review and meta-analysis

|                               |                                                                                                                                                                                                                                                                                                                                                                                                                                            |
|-------------------------------|--------------------------------------------------------------------------------------------------------------------------------------------------------------------------------------------------------------------------------------------------------------------------------------------------------------------------------------------------------------------------------------------------------------------------------------------|
| Journal:                      | <i>BMJ Open</i>                                                                                                                                                                                                                                                                                                                                                                                                                            |
| Manuscript ID                 | bmjopen-2021-048803                                                                                                                                                                                                                                                                                                                                                                                                                        |
| Article Type:                 | Protocol                                                                                                                                                                                                                                                                                                                                                                                                                                   |
| Date Submitted by the Author: | 11-Jan-2021                                                                                                                                                                                                                                                                                                                                                                                                                                |
| Complete List of Authors:     | Wentao, Ji; Changhai Hospital, Faculty of Anesthesiology<br>Xiaoting, ZHANG; Changhai Hospital, Faculty of Anesthesiology<br>Guolin, SUN; Changhai Hospital, Faculty of Anesthesiology<br>Xiandong, WANG; Changhai Hospital, Faculty of Anesthesiology<br>Jia, LIU; Changhai Hospital, Faculty of Anesthesiology<br>Jinjun, BIAN; Changhai Hospital, Faculty of Anesthesiology<br>Bo, Lulong; Changhai Hospital, Faculty of Anesthesiology |
| Keywords:                     | ANAESTHETICS, Colorectal surgery < SURGERY, Anaesthesia in oncology < ANAESTHETICS                                                                                                                                                                                                                                                                                                                                                         |
|                               |                                                                                                                                                                                                                                                                                                                                                                                                                                            |

SCHOLARONE™  
Manuscripts

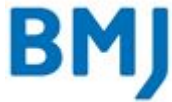

I, the Submitting Author has the right to grant and does grant on behalf of all authors of the Work (as defined in the below author licence), an exclusive licence and/or a non-exclusive licence for contributions from authors who are: i) UK Crown employees; ii) where BMJ has agreed a CC-BY licence shall apply, and/or iii) in accordance with the terms applicable for US Federal Government officers or employees acting as part of their official duties; on a worldwide, perpetual, irrevocable, royalty-free basis to BMJ Publishing Group Ltd ("BMJ") its licensees and where the relevant Journal is co-owned by BMJ to the co-owners of the Journal, to publish the Work in this journal and any other BMJ products and to exploit all rights, as set out in our [licence](#).

The Submitting Author accepts and understands that any supply made under these terms is made by BMJ to the Submitting Author unless you are acting as an employee on behalf of your employer or a postgraduate student of an affiliated institution which is paying any applicable article publishing charge ("APC") for Open Access articles. Where the Submitting Author wishes to make the Work available on an Open Access basis (and intends to pay the relevant APC), the terms of reuse of such Open Access shall be governed by a Creative Commons licence – details of these licences and which [Creative Commons](#) licence will apply to this Work are set out in our licence referred to above.

Other than as permitted in any relevant BMJ Author's Self Archiving Policies, I confirm this Work has not been accepted for publication elsewhere, is not being considered for publication elsewhere and does not duplicate material already published. I confirm all authors consent to publication of this Work and authorise the granting of this licence.

**TITLE****Effect of perioperative intravenous lidocaine on postoperative outcomes in patients undergoing resection of colorectal cancer: a protocol for systematic review and meta-analysis**

JI Wentao\*, ZHANG Xiaoting\*, SUN Guolin\*, WANG Xiandong, LIU Jia, BIAN

Jinjun#, BO Lulong#

Faculty of Anesthesiology, Changhai Hospital, Naval Medical University, Shagnhai

200433, China

\* JI,ZHANG,SUN contributed equally to the article

# corresponding authors

BIAN Jinjun

Faculty of Anesthesiology, Changhai Hospital, Naval Medical University.

Shagnhai 200433, China

Email: jinjunbicu@163.com

Telehpne (+86)21-31161841

BO Lulong

Faculty of Anesthesiology, Changhai Hospital, Naval Medical University.

Shagnhai 200433, China

Email: [bartbo@smmu.edu.cn](mailto:bartbo@smmu.edu.cn)

Telehpne (+86)21-31161840

## ABSTRACT

**Introduction** Techniques using local anesthetics provide high-quality analgesia, while the anti-inflammatory properties of these drugs may represent an additional advantage. Perioperative intravenous lidocaine has shown positive effects not only on postoperative pain but also on bowel function and duration of hospital stay, due to its analgesic, anti-inflammatory and opioid-sparing effects. However, these potential benefits are not well established in patients with colorectal cancer. This research aims to determine the effect of perioperative intravenous lidocaine on postoperative outcomes in patients undergoing resection of colorectal cancer.

**Methods and analysis** PubMed, Embase, Web of Science, CNKI, SinoMed and WanFang Data databases were electronically retrieved to include the randomized controlled trials comparing perioperative intravenous lidocaine with placebo infusion in patients undergoing resection of colorectal cancer before September 2020. Registers of clinical trials, potential grey literature and abstracts from conferences will also be searched. Two reviewers will screen literature, extract data and assess risk of bias of studies included independently. The primary outcome variable will be restoration of intestinal function. The secondary outcome variables will consist of the severity of postoperative pain at 4, 12, 24, and 48 hours after surgery, the incidence of postoperative nausea and vomiting, and the length of hospital stay. A meta-analysis will be performed using RevMan 5.4 software provided by the Cochrane Collaboration and Stata V.12.0. Subgroup and sensitivity analyses will be conducted.

**Ethics and dissemination** Because the data used for this systematic review will be exclusively extracted from published studies, ethical approval and informed consent of patients will not be required. The systematic review will be published in a peer-reviewed journal, presented at conferences and shared on social media platforms.

**PROSPERO registration number** CRD42020216232.

**Key words** Lidocaine; Colorectal cancer; Prognosis; Meta-analysis; Systematic review; Randomized controlled trial

Word Count: 2034

Table: 1 Figure: 1

## ARTICLE SUMMARY

### Strengths and limitations of this study

- This research will provide the best assessment with currently available data on whether perioperative intravenous lidocaine can improve postoperative outcomes in patients undergoing resection of colorectal cancer.
- The analysis of various sources of heterogeneity and the assessment of risk of bias of the included studies will be a critical point for extracting and synthesising evidence-based conclusions.
- One limitation of this study is that differences in duration of perioperative intravenous lidocaine as interventions cannot be restricted, which will affect study results possibly.
- Notably, this research will include only patients with colorectal cancer, which differs from other meta-analyses and may be an advantage or a challenge.

### INTRODUCTION

Perioperative intravenous lidocaine (IVL) infusion showed potential advantages in a range of surgical specialties, including hepatobiliary,<sup>1</sup> gynecological and colorectal surgery.<sup>2-3</sup> Studies have suggested that IVL conveys postoperative benefits including reduction of postoperative pain, and shortened time to return of gastrointestinal function.<sup>4-6</sup>

However, a recent randomized, double-blinded, placebo-controlled trial by Herzog et al. indicated that intravenous lidocaine had no significant benefits for patients undergoing robot-assisted colorectal surgery,<sup>7</sup> including cumulated morphine consumption at 24h or 72h after end of surgery, considering multiple outcomes including time until first flatus or defecation, use of antiemetics and time until discharge. Current evidence placed the question whether IVL improve postoperative outcomes in patients undergoing resection of colorectal cancer in an ambiguous area. We hypothesized that for patients with colorectal cancer, perioperative lidocaine

given intravenously would improve the restoration of intestinal function, relieve pain, reduce the incidence of postoperative nausea and vomiting (PONV) and shorten the length of hospital stay (LOS) after surgery.

## **METHODS**

This protocol has been registered on the PROSPERO (registration number: CRD42020216232) based on the PRISMA-P guidelines. The protocol will follow the Meta-analysis of Observational Studies in Epidemiology,<sup>8</sup> the Cochrane Handbook for Systematic Reviews of Interventions and the Preferred Reporting Items for Systematic Reviews and Meta-Analysis Protocol (PRISMA-P) statement guideline.<sup>9</sup>

### **Inclusion criteria for study selection**

#### **Types of studies**

All studies designed as randomized controlled trials (RCTs) will be included. The current clinical trial results will be objectively integrated, which is conducive to the evaluation of the efficacy of IVL on postoperative outcomes in patients undergoing resection of colorectal cancer. Exclusion criteria comprised paediatric patients, non-colorectal or emergency procedures, non-RCT methodology, and lack of any relevant clinical outcome measures. We will also exclude reviews, qualitative studies, animal trials and laboratory studies. Studies that included more than two study arms, but had IVL and placebo groups, were included and only those groups pertinent to this meta-analysis were considered.

#### **Types of patients**

Patients scheduled for resection of colorectal cancer will be included in this study. Other restrictions included age ( $\geq 18$  years old) and American Society of Anesthesiologists' (ASA) physical status (I - III).

#### **Types of interventions**

Perioperative intravenous lidocaine is administered as the intervention. Normal saline (NS) as placebo or no intervention could be administered in the control groups. No consideration was given to how long the lidocaine infusion was continued after surgery, but to be eligible for inclusion, the infusion had to commence before the

surgical incision.

## **Types of outcome measures**

### **Primary outcomes**

The primary outcome variable is the restoration of intestinal function, including the time until first postoperative flatus and defecation. Flatus and defecation are important indications for exclusion of intestinal obstruction and restoration of intestinal function postoperatively.<sup>10</sup>

### **Secondary outcomes**

The secondary outcome variables include the severity of pain measured using VAS on postoperative days at 4, 12, 24, and 48 hours after surgery, the incidence of PONV, and the LOS.

## **Search methods for the identification of studies**

### **Electronic searches**

Six electric databases (PubMed, Embase, Web of Science, CNKI, SinoMed and WanFang Data) will be searched without language restriction to identify RCTs published before September 2020. A search strategy has been developed for the 6 databases as a combination of “Colonic Neoplasms”, “Rectal Neoplasms”, or “Colorectal Neoplasms” in all fields and “lidocaine” or “lignocaine” in all fields and “Infusions” or “Intravenous” in all fields and “Randomized Controlled Trial” or “RCT” in all fields. The reference lists will be searched manually for potentially relevant articles.

The search strategy for PubMed is described in table 1, which will include all search terms, and other searches will be carried out based on those results. This will be suitably adapted to search in the other databases. There are no limits on language and publication status.

---

Table 1 Search strategy used in PubMed database

---

Number Search terms

---

#1 "Colonic Neoplasms"[Mesh]

#2 "Rectal Neoplasms"[Mesh]

---



- 
- 1  
2  
3  
4 #3 "Colorectal Neoplasms"[Mesh]  
5  
6 #4 (colon[Title/Abstract]) OR (rectal[Title/Abstract]) OR (colorectal[Title/Abstract]) OR  
7 (proctectomy[Title/Abstract]) OR (colonic[Title/Abstract])  
8  
9 #5 #1 OR #2 OR #3 OR #4  
10  
11 #6 "Lidocaine"[Mesh]  
12  
13 #7 (lidocaine[Title/Abstract]) OR (lignocaine[Title/Abstract])  
14  
15 #8 #6 OR #7  
16  
17 #9 "Infusions, Intravenous"[Mesh]  
18  
19 #10 (intravenous) OR (infusion)  
20  
21 #11 #9 OR #10  
22  
23 #12 "Randomized Controlled Trial" [Publication Type]  
24  
25 #13 (RCT) OR (randomized controlled trial)  
26  
27 #14 #12 OR #13  
28  
29 #15 #5 AND #8 AND #11 AND #14  
30  
31
- 

### Searching other resources

We will also search PROSPERO, the International Clinical Trials Registry Platform, ClinicalTrials.gov, dissertations, and grey literature to identify systematic reviews or clinical trials related to IVL. Manual searches will be conducted for related journals and conference processes.

### Data collection and analysis

#### Selection of studies

Two reviewers (JWT and ZXT) will screen the search results according to the title and abstract independently. After the full text is obtained, the 2 reviewer will screen the references for potentially relevant studies. Any discord will be resolved by discussion between the two authors and an arbiter (SGL). The selection procedure for the study will be summarized and shown in a PRISMA flow chart (Figure 1).

#### Data extraction

Based on the inclusion criteria, a standard form of data collection will be produced

1  
2  
3  
4 prior to data extraction. The 2 reviewers (JWT and ZXT) will independently extract  
5 data on patient baseline demographics (age, sex, ASA physical status), operative  
6 variables and details of the lidocaine administration (dose, starting point, perioperative  
7 duration and any bolus dose administered) as well as the placebo. The studies  
8 included were stratified according to whether the patients underwent open or  
9 laparoscopic resection. If the data necessary for meta-analysis of continuous variables  
10 were not available, the corresponding author was approached to provide the raw data,  
11 and if a response was not received, the technique described by Hozo et al. was  
12 employed to estimate the mean and standard deviation from the median and  
13 interquartile range [IQR].<sup>11</sup> When the consensus on data extraction is not available  
14 through discussion, the third reviewer (SGL) will make a decision.

#### 25 **Assessment of study quality**

26  
27 The Cochrane Collaborations tool will be used to assess selection bias, performance  
28 bias, attrition bias and reporting bias. Two reviewers (JWT and ZXT) will  
29 independently rate the quality of the RCTs and fulfill the items of risk of bias as low,  
30 high, or unclear. Any discrepancies between the 2 reviewers will be solved by a  
31 consulting group including two experts (WXD and SGL). The quality of evidence  
32 resulting from this systematic review was evaluated through the Grading of  
33 Recommendations Assessment, Development and Evaluation (GRADE), and the level  
34 of evidence will be classified as high, medium, low, or very low.<sup>12</sup>

#### 43 **Statistical analyses and data synthesis**

44  
45 Review Manager, Version 5.4 will be used for data synthesis. The pooled effects of  
46 dichotomous outcomes will be analyzed as risk ratio (RR) using the Mantel-Haenszel  
47 (M-H) technique and 95% confidence intervals (CIs). The pooled effects of  
48 continuous outcomes will be analyzed using mean difference (MD) and 95% CI. A *P*  
49 value of less than 0.05 will be considered to be statistically significant.

#### 54 **Assessment of heterogeneity**

55  
56 *I*<sup>2</sup> statistic will be used to estimate statistical heterogeneity (*I*<sup>2</sup> ≤ 50% as low  
57 heterogeneity, *I*<sup>2</sup> > 50% as high heterogeneity). Clinical heterogeneity will be  
58  
59  
60

1  
2  
3  
4 assessed by the 2 reviewers (JWT and ZXT) and the consulting group (WXD and  
5 SGL). If high clinical or statistical heterogeneity is observed, a random effect model  
6 will be used. Otherwise, a fixed effect model will be chosen.  
7  
8

### 9 10 **Assessment of publication bias**

11 A funnel plot will be used to assess publication bias when ten or more RCTs are  
12 available for quantitative analysis. Egger test will be performed if included studies are  
13 less than ten.<sup>13</sup> For Egger's test, *p* value of greater than 0.05 was determined as no  
14 significant publishing bias or small-study effects in studies. As funnel plot asymmetry  
15 does not necessarily suggest reporting bias, we will attempt to recognize potential  
16 causes for the asymmetry, including poor methodological quality and true  
17 heterogeneity of studies.  
18  
19  
20  
21  
22  
23  
24

### 25 **Subgroup and sensitivity analyses**

26 On detection of heterogeneity, a subgroup analysis will be carried out to judge the  
27 source of heterogeneity. The criteria for a subgroup analysis potentially include age,  
28 type of surgery, and intervention dosage, frequency and duration. Considering the  
29 significant difference in the degree of trauma between laparoscopic surgery and open  
30 surgery, a subgroup analysis of surgical methods is necessary.<sup>14</sup>  
31  
32  
33  
34  
35  
36

37 Sensitivity analysis will be performed to determine the robustness of aggregate  
38 estimates and to detect whether any single study accounts for a substantial proportion  
39 of heterogeneity by eliminating the included studies from the summary review one by  
40 one. If low-quality articles are deleted, then a second meta-analysis will be carried  
41 out. Comparison and discussion of the results and effect size of the two meta-analyses  
42 will be held.<sup>15</sup>  
43  
44  
45  
46  
47  
48

### 49 **Trial sequential analysis**

50 Assessment of the risk of random errors will be done by trial sequential analysis  
51 (TSA). The results of TSA will determine whether the evidence in our meta-analysis  
52 is reliable and conclusive by providing the boundaries of sample size.<sup>16</sup>  
53  
54  
55  
56

### 57 **Patient and public involvement**

58 Patients and the public will not participate in the study. However, once scientific  
59  
60

1  
2  
3  
4 publications disseminate our findings, they are circulated across social networks so  
5  
6 that our conclusions will potentially affect the actions of anesthesiologists and health  
7  
8 policymakers.

### 9 10 **Ethics and dissemination**

11 Because the data used for this systematic review will be exclusively extracted from  
12  
13 published studies, ethical approval and informed consent of patients will not be  
14  
15 required. The systematic review will be published in a peer-reviewed journal,  
16  
17 presented at conferences and shared on social media platforms.  
18  
19

## 20 21 **DISCUSSION**

22  
23 There has been increasing interest and evidence in the potential for IVL infusion in  
24  
25 patients undergoing colorectal surgery. A Cochrane review analyzed a total of 68  
26  
27 RCTs across various surgical specialties and demonstrated an unclear effect of IVL  
28  
29 versus placebo on pain scores, recovery of gastrointestinal function, postoperative  
30  
31 nausea and overall opioid requirement.<sup>17</sup>

32  
33 Specific to the field of colorectal surgery, a recently published meta-analysis within  
34  
35 colorectal surgery provides support for the administration of perioperative IVL in  
36  
37 terms of earlier return of gastrointestinal function, lower postoperative pain scores and  
38  
39 reduced hospital LOS,<sup>18</sup> with no difference in complication rates or apparent issues  
40  
41 surrounding local anaesthetic toxicity. Another systematic review examined the role  
42  
43 of IVL in the setting of elective colorectal surgery and concluded that IVL provided  
44  
45 limited benefit in the reduction of early postoperative pain and morphine requirement  
46  
47 when compared with placebo.<sup>19</sup> Thus, a comprehensive systematic review and  
48  
49 meta-analysis including new trials were warranted.

50  
51 The underlying mechanisms of IVL might be multifactorial. Lidocaine has been  
52  
53 shown to have anti-inflammatory, analgesic and opioid-sparing properties.<sup>20 21</sup>  
54  
55 Furthermore, the alleviative pain and the accelerated return of bowel function seem to  
56  
57 be contributive to other effects.

58  
59 Overall, perioperative administration of lidocaine could improve the restoration of  
60

1  
2  
3  
4 intestinal function, relieve pain, reduce the incidence of PONV and shorten the LOS  
5  
6 in patients undergoing resection of colorectal cancer. However, the previous  
7  
8 meta-analyses showed very different results. Meanwhile, systemic analyses focused  
9  
10 on the patients with colorectal cancer seem to be absent. With the updated RCTs, the  
11  
12 results of this meta-analysis will provide advanced evidence on the efficacy of IVL in  
13  
14 patients undergoing resection of colorectal cancer.  
15  
16

17  
18 **Author contributions** BLL and JWT designed the study. BLL and BJJ were the  
19  
20 principal investigator and guarantor. JWT, ZXT and SGL were the main coordinators  
21  
22 of the study. JWT, ZXT, SGL and WXD conducted the study. SGL and BLL provided  
23  
24 statistical and epidemiological support. JWT wrote the article with the support of BLL  
25  
26 and ZXT. All the authors revised and approved the final version of the manuscript.  
27

28 **Author affiliations** Faculty of Anesthesiology, Changhai Hospital, Naval Medical  
29  
30 University, Shanghai 200433, China.  
31

32 **Data statement** No additional data are available.  
33

34 **Acknowledgements** We would like to thank the primary authors and sponsors  
35  
36 that have provided access to their trial's database.  
37

38 **Funding** The authors acknowledged the support from Shanghai Outstanding Youth  
39  
40 Medical Professionals Training Program (2017YQ015), and Shanghai Science and  
41  
42 Technology Committee Rising-Star Program (19QA1408500).  
43

44 **Competing interests** None declared.  
45

46 **Patient consent for publication** Not required.  
47

48 **Provenance and peer review** Not commissioned; externally peer reviewed.  
49

50 **Open access** This is an open access article distributed in accordance with the  
51  
52 Creative Commons Attribution Non Commercial (CC BY- NC 4.0) license, which  
53  
54 permits others to distribute, remix, adapt, build upon this work non-commercially,  
55  
56 and license their derivative works on different terms, provided the original work is  
57  
58 properly cited, appropriate credit is given, any changes made indicated, and the use  
59  
60 is non-commercial. See: <http://creativecommons.org/licenses/by-nc/4.0/>.

## ORCID iD

Wentao Ji <https://orcid.org/0000-0002-6602-6313>

Lulong Bo <https://orcid.org/0000-0001-6787-1837>

Figure 1 The PRISMA flow chart of the selection process. PRISMA, Preferred Reporting Items for Systematic Reviews and Meta-Analyses; RCT, randomised controlled trial.

## REFERENCES

1. Zhao JB, Li YL, Wang YM, et al. Intravenous lidocaine infusion for pain control after laparoscopic cholecystectomy: A meta-analysis of randomized controlled trials. *Medicine* 2018;97(5):e9771.
2. Samimi S, Taheri A, Davari Tanha F. Comparison Between Intraperitoneal and Intravenous Lidocaine for Postoperative Analgesia After Elective Abdominal Hysterectomy, a Double-Blind Placebo Controlled Study. *Journal of family & reproductive health* 2015;9(4):193-8.
3. Dewinter G, Coppens S, Van de Velde M, et al. Quadratus Lumborum Block Versus Perioperative Intravenous Lidocaine for Postoperative Pain Control in Patients Undergoing Laparoscopic Colorectal Surgery: A Prospective, Randomized, Double-blind Controlled Clinical Trial. *Annals of surgery* 2018;268(5):769-75.
4. Dunn LK, Durieux ME. Perioperative Use of Intravenous Lidocaine. *Anesthesiology* 2017;126(4):729-37.
5. Cooke C, Kennedy ED, Foo I, et al. Meta-analysis of the effect of perioperative intravenous lidocaine on return of gastrointestinal function after colorectal surgery. *Techniques in coloproctology* 2019;23(1):15-24.
6. Tikuišis R, Miliauskas P, Samalavičius NE, et al. Intravenous lidocaine for post-operative pain relief after hand-assisted laparoscopic colon surgery: a randomized, placebo-controlled clinical trial. *Techniques in coloproctology* 2014;18(4):373-80.
7. Herzog J, Schou M, Jensen KM, et al. A randomised controlled trial of lidocaine infusion on post-operative opioid consumption in patients undergoing robotic colorectal surgery. *Danish medical journal* 2020;67(1)
8. Stroup DF, Berlin JA, Morton SC, et al. Meta-analysis of observational studies in epidemiology: a proposal for reporting. Meta-analysis Of Observational Studies in Epidemiology (MOOSE) group. *Jama* 2000;283(15):2008-12.
9. Moher D, Shamseer L, Clarke M, Ghersi D, Liberati A, Petticrew M, Shekelle P, Stewart LA. Preferred Reporting Items for Systematic Review and Meta-Analysis Protocols (PRISMA-P) 2015 statement. *Syst Rev.* 2015;4(1):1.
10. Buia A, Stockhausen F, Hanisch E. Laparoscopic surgery: A qualified systematic review. *World journal of methodology* 2015;5(4):238-54.
11. Hozo SP, Djulbegovic B, Hozo I. Estimating the mean and variance from the median, range, and the size of a sample. *BMC medical research methodology* 2005;5:13.
12. Guyatt GH, Oxman AD, Schünemann HJ, et al. GRADE guidelines: a new series of articles in the *Journal of Clinical Epidemiology*. *Journal of clinical epidemiology* 2011;64(4):380-2.

13. Egger M, Davey Smith G, Schneider M, et al. Bias in meta-analysis detected by a simple, graphical test. *BMJ (Clinical research ed)* 1997;315(7109):629-34.
14. Delaney CP, Marcello PW, Sonoda T, et al. Gastrointestinal recovery after laparoscopic colectomy: results of a prospective, observational, multicenter study. *Surgical endoscopy* 2010;24(3):653-61.
15. Han M, Nong L, Liu Z, et al. Safety and efficacy of mycophenolate mofetil in treating neuromyelitis optica spectrum disorders: a protocol for systematic review and meta-analysis. *BMJ open* 2020;10(11):e040371.
16. Wetterslev J, Thorlund K, Brok J, et al. Trial sequential analysis may establish when firm evidence is reached in cumulative meta-analysis. *Journal of clinical epidemiology* 2008;61(1):64-75.
17. Weibel S, Jelting Y, Pace NL, et al. Continuous intravenous perioperative lidocaine infusion for postoperative pain and recovery in adults. *The Cochrane database of systematic reviews* 2018;6(6):Cd009642.
18. Rollins KE, Javanmard-Emamghissi H, Scott MJ, et al. The impact of peri-operative intravenous lidocaine on postoperative outcome after elective colorectal surgery: A meta-analysis of randomised controlled trials. *European journal of anaesthesiology* 2020;37(8):659-70.
19. MacFater WS, Rahiri JL, Lauti M, et al. Intravenous lignocaine in colorectal surgery: a systematic review. *ANZ journal of surgery* 2017;87(11):879-85.
20. Cui W, Li Y, Li S, et al. Systemic administration of lidocaine reduces morphine requirements and postoperative pain of patients undergoing thoracic surgery after propofol-remifentanil-based anaesthesia. *European journal of anaesthesiology* 2010;27(1):41-6.
21. Ortiz MP, Godoy MC, Schlosser RS, et al. Effect of endovenous lidocaine on analgesia and serum cytokines: double-blinded and randomized trial. *Journal of clinical anesthesia* 2016;35:70-77.

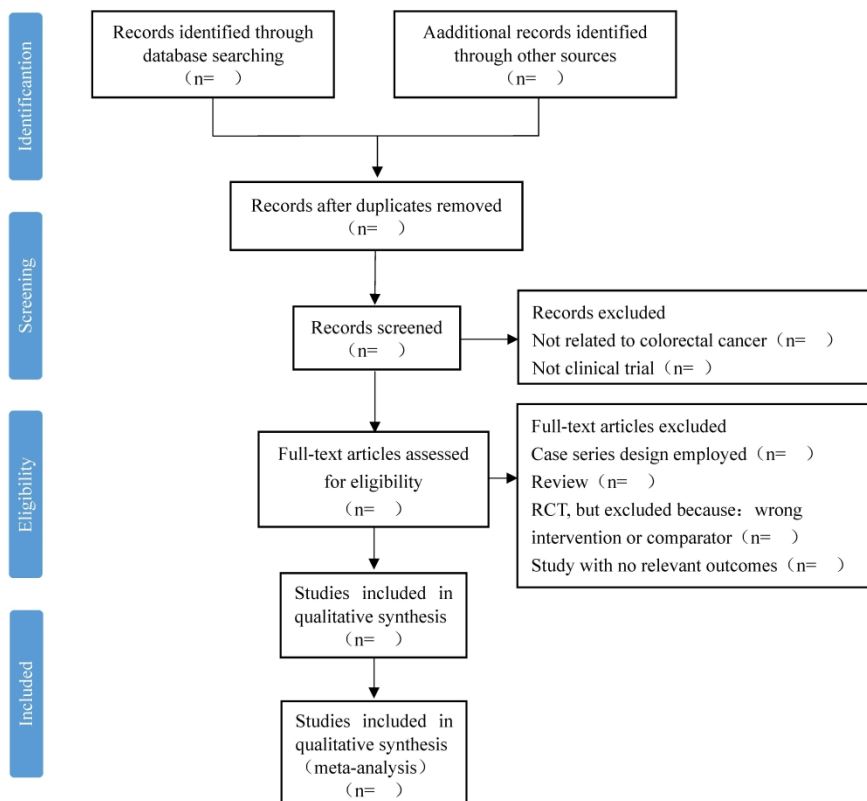

Figure 1 The PRISMA flow chart of the selection process. PRISMA, Preferred Reporting Items for Systematic Reviews and Meta-Analyses; RCT, randomised controlled trial.

1237x1259mm (96 x 96 DPI)



# Reporting checklist for protocol of a systematic review.

Based on the PRISMA-P guidelines.

## Instructions to authors

Complete this checklist by entering the page numbers from your manuscript where readers will find each of the items listed below.

Your article may not currently address all the items on the checklist. Please modify your text to include the missing information. If you are certain that an item does not apply, please write "n/a" and provide a short explanation.

Upload your completed checklist as an extra file when you submit to a journal.

In your methods section, say that you used the PRISMA-Preporting guidelines, and cite them as:

Moher D, Shamseer L, Clarke M, Ghersi D, Liberati A, Petticrew M, Shekelle P, Stewart LA. Preferred Reporting Items for Systematic Review and Meta-Analysis Protocols (PRISMA-P) 2015 statement. *Syst Rev.* 2015;4(1):1.

| Reporting Item      |                                                                                                                                                               | Page Number |
|---------------------|---------------------------------------------------------------------------------------------------------------------------------------------------------------|-------------|
| <b>Title</b>        |                                                                                                                                                               |             |
| Identification      | <a href="#">#1a</a> Identify the report as a protocol of a systematic review                                                                                  | 1           |
| Update              | <a href="#">#1b</a> If the protocol is for an update of a previous systematic review, identify as such                                                        | n/a         |
| <b>Registration</b> |                                                                                                                                                               |             |
|                     | <a href="#">#2</a> If registered, provide the name of the registry (such as PROSPERO) and registration number                                                 | 2           |
| <b>Authors</b>      |                                                                                                                                                               |             |
| Contact             | <a href="#">#3a</a> Provide name, institutional affiliation, e-mail address of all protocol authors; provide physical mailing address of corresponding author | 1           |
| Contribution        | <a href="#">#3b</a> Describe contributions of protocol authors and identify the guarantor of the review                                                       | 10          |

## Amendments

|    |                      |                      |                                                                           |     |
|----|----------------------|----------------------|---------------------------------------------------------------------------|-----|
| 1  |                      | <a href="#">#4</a>   | If the protocol represents an amendment of a previously completed or      | n/a |
| 2  |                      |                      | published protocol, identify as such and list changes; otherwise, state   |     |
| 3  |                      |                      | plan for documenting important protocol amendments                        |     |
| 4  |                      |                      |                                                                           |     |
| 5  |                      |                      |                                                                           |     |
| 6  | <b>Support</b>       |                      |                                                                           |     |
| 7  |                      |                      |                                                                           |     |
| 8  | Sources              | <a href="#">#5a</a>  | Indicate sources of financial or other support for the review             | 10  |
| 9  |                      |                      |                                                                           |     |
| 10 | Sponsor              | <a href="#">#5b</a>  | Provide name for the review funder and / or sponsor                       | n/a |
| 11 |                      |                      |                                                                           |     |
| 12 | Role of sponsor or   | <a href="#">#5c</a>  | Describe roles of funder(s), sponsor(s), and / or institution(s), if any, | n/a |
| 13 | funder               |                      | in developing the protocol                                                |     |
| 14 |                      |                      |                                                                           |     |
| 15 |                      |                      |                                                                           |     |
| 16 |                      |                      |                                                                           |     |
| 17 | <b>Introduction</b>  |                      |                                                                           |     |
| 18 |                      |                      |                                                                           |     |
| 19 | Rationale            | <a href="#">#6</a>   | Describe the rationale for the review in the context of what is already   | 3   |
| 20 |                      |                      | known                                                                     |     |
| 21 |                      |                      |                                                                           |     |
| 22 | Objectives           | <a href="#">#7</a>   | Provide an explicit statement of the question(s) the review will          | 3   |
| 23 |                      |                      | address with reference to participants, interventions, comparators, and   |     |
| 24 |                      |                      | outcomes (PICO)                                                           |     |
| 25 |                      |                      |                                                                           |     |
| 26 |                      |                      |                                                                           |     |
| 27 |                      |                      |                                                                           |     |
| 28 | <b>Methods</b>       |                      |                                                                           |     |
| 29 |                      |                      |                                                                           |     |
| 30 | Eligibility criteria | <a href="#">#8</a>   | Specify the study characteristics (such as PICO, study design, setting,   | 4-5 |
| 31 |                      |                      | time frame) and report characteristics (such as years considered,         |     |
| 32 |                      |                      | language, publication status) to be used as criteria for eligibility for  |     |
| 33 |                      |                      | the review                                                                |     |
| 34 |                      |                      |                                                                           |     |
| 35 | Information sources  | <a href="#">#9</a>   | Describe all intended information sources (such as electronic             | 5-6 |
| 36 |                      |                      | databases, contact with study authors, trial registers or other grey      |     |
| 37 |                      |                      | literature sources) with planned dates of coverage                        |     |
| 38 |                      |                      |                                                                           |     |
| 39 | Search strategy      | <a href="#">#10</a>  | Present draft of search strategy to be used for at least one electronic   | 5-6 |
| 40 |                      |                      | database, including planned limits, such that it could be repeated        |     |
| 41 |                      |                      |                                                                           |     |
| 42 | Study records - data | <a href="#">#11a</a> | Describe the mechanism(s) that will be used to manage records and         | 6   |
| 43 | management           |                      | data throughout the review                                                |     |
| 44 |                      |                      |                                                                           |     |
| 45 | Study records -      | <a href="#">#11b</a> | State the process that will be used for selecting studies (such as two    | 6   |
| 46 | selection process    |                      | independent reviewers) through each phase of the review (that is,         |     |
| 47 |                      |                      | screening, eligibility and inclusion in meta-analysis)                    |     |
| 48 |                      |                      |                                                                           |     |
| 49 | Study records - data | <a href="#">#11c</a> | Describe planned method of extracting data from reports (such as          | 6-7 |
| 50 | collection process   |                      | piloting forms, done independently, in duplicate), any processes for      |     |
| 51 |                      |                      |                                                                           |     |
| 52 |                      |                      |                                                                           |     |
| 53 |                      |                      |                                                                           |     |
| 54 |                      |                      |                                                                           |     |
| 55 |                      |                      |                                                                           |     |
| 56 |                      |                      |                                                                           |     |
| 57 |                      |                      |                                                                           |     |
| 58 |                      |                      |                                                                           |     |
| 59 |                      |                      |                                                                           |     |
| 60 |                      |                      |                                                                           |     |

|    |                    |                                                                                           |     |
|----|--------------------|-------------------------------------------------------------------------------------------|-----|
|    |                    | obtaining and confirming data from investigators                                          |     |
| 1  |                    |                                                                                           |     |
| 2  |                    |                                                                                           |     |
| 3  | Data items         | <a href="#">#12</a> List and define all variables for which data will be sought (such as  | 4-5 |
| 4  |                    | PICO items, funding sources), any pre-planned data assumptions and                        |     |
| 5  |                    | simplifications                                                                           |     |
| 6  |                    |                                                                                           |     |
| 7  |                    |                                                                                           |     |
| 8  | Outcomes and       | <a href="#">#13</a> List and define all outcomes for which data will be sought, including | 4-5 |
| 9  | prioritization     | prioritization of main and additional outcomes, with rationale                            |     |
| 10 |                    |                                                                                           |     |
| 11 |                    |                                                                                           |     |
| 12 | Risk of bias in    | <a href="#">#14</a> Describe anticipated methods for assessing risk of bias of individual | 8   |
| 13 | individual studies | studies, including whether this will be done at the outcome or study                      |     |
| 14 |                    | level, or both; state how this information will be used in data synthesis                 |     |
| 15 |                    |                                                                                           |     |
| 16 |                    |                                                                                           |     |
| 17 | Data synthesis     | <a href="#">#15a</a> Describe criteria under which study data will be quantitatively      | 7   |
| 18 |                    | synthesised                                                                               |     |
| 19 |                    |                                                                                           |     |
| 20 |                    |                                                                                           |     |
| 21 | Data synthesis     | <a href="#">#15b</a> If data are appropriate for quantitative synthesis, describe planned | 7   |
| 22 |                    | summary measures, methods of handling data and methods of                                 |     |
| 23 |                    | combining data from studies, including any planned exploration of                         |     |
| 24 |                    | consistency (such as I <sup>2</sup> , Kendall's $\tau$ )                                  |     |
| 25 |                    |                                                                                           |     |
| 26 |                    |                                                                                           |     |
| 27 |                    |                                                                                           |     |
| 28 | Data synthesis     | <a href="#">#15c</a> Describe any proposed additional analyses (such as sensitivity or    | 8   |
| 29 |                    | subgroup analyses, meta-regression)                                                       |     |
| 30 |                    |                                                                                           |     |
| 31 | Data synthesis     | <a href="#">#15d</a> If quantitative synthesis is not appropriate, describe the type of   | n/a |
| 32 |                    | summary planned                                                                           |     |
| 33 |                    |                                                                                           |     |
| 34 |                    |                                                                                           |     |
| 35 | Meta-bias(es)      | <a href="#">#16</a> Specify any planned assessment of meta-bias(es) (such as publication  | 8   |
| 36 |                    | bias across studies, selective reporting within studies)                                  |     |
| 37 |                    |                                                                                           |     |
| 38 |                    |                                                                                           |     |
| 39 | Confidence in      | <a href="#">#17</a> Describe how the strength of the body of evidence will be assessed    | 7   |
| 40 | cumulative         | (such as GRADE)                                                                           |     |
| 41 | evidence           |                                                                                           |     |
| 42 |                    |                                                                                           |     |
| 43 |                    |                                                                                           |     |

The PRISMA-P checklist is distributed under the terms of the Creative Commons Attribution License CC-BY 4.0. This checklist was completed on 06. January 2021 using <https://www.goodreports.org/>, a tool made by the [EQUATOR Network](#) in collaboration with [Penelope.ai](#)

# BMJ Open

## Effect of perioperative intravenous lidocaine on postoperative outcomes in patients undergoing resection of colorectal cancer: a protocol for systematic review and meta-analysis

|                                 |                                                                                                                                                                                                                                                                                                                                                                                                                                            |
|---------------------------------|--------------------------------------------------------------------------------------------------------------------------------------------------------------------------------------------------------------------------------------------------------------------------------------------------------------------------------------------------------------------------------------------------------------------------------------------|
| Journal:                        | <i>BMJ Open</i>                                                                                                                                                                                                                                                                                                                                                                                                                            |
| Manuscript ID                   | bmjopen-2021-048803.R1                                                                                                                                                                                                                                                                                                                                                                                                                     |
| Article Type:                   | Protocol                                                                                                                                                                                                                                                                                                                                                                                                                                   |
| Date Submitted by the Author:   | 25-Jul-2021                                                                                                                                                                                                                                                                                                                                                                                                                                |
| Complete List of Authors:       | Wentao, Ji; Changhai Hospital, Faculty of Anesthesiology<br>Xiaoting, ZHANG; Changhai Hospital, Faculty of Anesthesiology<br>Guolin, SUN; Changhai Hospital, Faculty of Anesthesiology<br>Xiandong, WANG; Changhai Hospital, Faculty of Anesthesiology<br>Jia, LIU; Changhai Hospital, Faculty of Anesthesiology<br>Jinjun, BIAN; Changhai Hospital, Faculty of Anesthesiology<br>Bo, Lulong; Changhai Hospital, Faculty of Anesthesiology |
| <b>Primary Subject Heading</b>: | Anaesthesia                                                                                                                                                                                                                                                                                                                                                                                                                                |
| Secondary Subject Heading:      | Surgery                                                                                                                                                                                                                                                                                                                                                                                                                                    |
| Keywords:                       | ANAESTHETICS, Colorectal surgery < SURGERY, Anaesthesia in oncology < ANAESTHETICS, Gastrointestinal tumours < ONCOLOGY                                                                                                                                                                                                                                                                                                                    |
|                                 |                                                                                                                                                                                                                                                                                                                                                                                                                                            |

SCHOLARONE™  
Manuscripts



I, the Submitting Author has the right to grant and does grant on behalf of all authors of the Work (as defined in the below author licence), an exclusive licence and/or a non-exclusive licence for contributions from authors who are: i) UK Crown employees; ii) where BMJ has agreed a CC-BY licence shall apply, and/or iii) in accordance with the terms applicable for US Federal Government officers or employees acting as part of their official duties; on a worldwide, perpetual, irrevocable, royalty-free basis to BMJ Publishing Group Ltd ("BMJ") its licensees and where the relevant Journal is co-owned by BMJ to the co-owners of the Journal, to publish the Work in this journal and any other BMJ products and to exploit all rights, as set out in our [licence](#).

The Submitting Author accepts and understands that any supply made under these terms is made by BMJ to the Submitting Author unless you are acting as an employee on behalf of your employer or a postgraduate student of an affiliated institution which is paying any applicable article publishing charge ("APC") for Open Access articles. Where the Submitting Author wishes to make the Work available on an Open Access basis (and intends to pay the relevant APC), the terms of reuse of such Open Access shall be governed by a Creative Commons licence – details of these licences and which [Creative Commons](#) licence will apply to this Work are set out in our licence referred to above.

Other than as permitted in any relevant BMJ Author's Self Archiving Policies, I confirm this Work has not been accepted for publication elsewhere, is not being considered for publication elsewhere and does not duplicate material already published. I confirm all authors consent to publication of this Work and authorise the granting of this licence.

**TITLE****Effect of perioperative intravenous lidocaine on postoperative outcomes in patients undergoing resection of colorectal cancer: a protocol for systematic review and meta-analysis**

JI Wentao\*, ZHANG Xiaoting\*, SUN Guolin\*, WANG Xiandong, LIU Jia, BIAN

Jinjun#, BO Lulong#

Faculty of Anesthesiology, Changhai Hospital, Naval Medical University, Shanghai

200433, China

\* JI, ZHANG, SUN contributed equally to the article

# corresponding authors

BIAN Jinjun

Faculty of Anesthesiology, Changhai Hospital, Naval Medical University.

Shanghai 200433, China

Email: jinjunbicu@163.com

Telephone (+86)21-31161841

BO Lulong

Faculty of Anesthesiology, Changhai Hospital, Naval Medical University.

Shanghai 200433, China

Email: [bartbo@smmu.edu.cn](mailto:bartbo@smmu.edu.cn)

Telephone (+86)21-31161839

## ABSTRACT

**Introduction** Techniques using local anesthetics provide high-quality analgesia, while the anti-inflammatory properties of these drugs may represent an additional advantage. Perioperative intravenous lidocaine has shown positive effects not only on postoperative pain but also on bowel function and duration of hospital stay, due to its analgesic, anti-inflammatory and opioid-sparing effects. However, these potential benefits are not well established in patients undergoing resection with colorectal cancer. This research aims to determine the effect of perioperative intravenous lidocaine on postoperative outcomes in patients undergoing resection of colorectal cancer.

**Methods and analysis** PubMed, Embase, Web of Science, CNKI, SinoMed and WanFang Data databases were electronically retrieved to include the randomized controlled trials comparing perioperative intravenous lidocaine with placebo infusion in patients undergoing resection of colorectal cancer before August 2021. Registers of clinical trials, potential grey literature and abstracts from conferences will also be searched. Two reviewers will screen literature, extract data and assess risk of bias of studies included independently. The primary outcome variable will be long-term survival outcome, tumor recurrence and metastasis rate, and restoration of intestinal function. The secondary outcome variables will consist of the severity of postoperative pain at 4, 12, 24, and 48 hours after surgery, the incidence of postoperative nausea and vomiting, and the length of hospital stay. A meta-analysis will be performed using RevMan 5.4 software provided by the Cochrane Collaboration and Stata V.12.0. Subgroup and sensitivity analyses will be conducted.

**Ethics and dissemination** Because the data used for this systematic review will be exclusively extracted from published studies, ethical approval and informed consent of patients will not be required. The systematic review will be published in a peer-reviewed journal, presented at conferences and shared on social media platforms.

**PROSPERO registration number** CRD42020216232.

**Key words** Lidocaine; Colorectal cancer; Prognosis; Meta-analysis; Systematic review; Randomized controlled trial

Word Count: 2204

Table: 0 Figure: 1

## ARTICLE SUMMARY

### Strengths and limitations of this study

- This research will provide the best assessment with currently available data on whether perioperative intravenous lidocaine can improve postoperative outcomes in patients undergoing resection of colorectal cancer.
- The analysis of various sources of heterogeneity and the assessment of risk of bias of the included studies will be a critical point for extracting and synthesizing evidence-based conclusions.
- One limitation of this study is that differences in duration of perioperative intravenous lidocaine as interventions cannot be restricted, which might affect results of this study.
- Notably, this research will include only patients with colorectal cancer, which differs from other meta-analyses and may be an advantage or a challenge.



## INTRODUCTION

Perioperative intravenous lidocaine (IVL) infusion showed potential advantages in a range of surgical specialties, including hepatobiliary,<sup>1</sup> gynecological, and colorectal surgery.<sup>2-3</sup> Local anesthetics may have some effects on cancer cell viability and migration.<sup>4,5</sup> Several preclinical studies have shown that lidocaine has a prominent anti-tumor activity on multiple cancer cells and is a promising therapeutic agent for the treatment of cancer.<sup>6-8</sup> However, the effect of IVL on the postoperative outcomes of colorectal cancer patients controversial. Studies have suggested that IVL conveys postoperative benefits including reduction of postoperative pain, and shortened time to return of gastrointestinal function.<sup>9-12</sup> However, a recent randomized, double-blinded, placebo-controlled trial by Herzog et al. indicated that intravenous lidocaine had no significant benefits for patients undergoing robot-assisted colorectal surgery,<sup>13</sup> including cumulated morphine consumption at 24h or 72h after end of surgery, considering multiple outcomes including time until first flatus or defecation, use of antiemetics and time until discharge.

We hypothesized that for patients with colorectal cancer, perioperative lidocaine given intravenously would have benefits on long-term survival outcome, reduce or delay the chance of tumor recurrence or metastasis, improve the restoration of intestinal function, relieve pain, reduce the incidence of postoperative nausea and vomiting (PONV), and shorten the length of hospital stay (LOS) after surgery.

## METHODS

This protocol has been registered on the PROSPERO (registration number: CRD42020216232) based on the PRISMA-P guidelines. The protocol will follow the Meta-analysis of Observational Studies in Epidemiology,<sup>14</sup> the Cochrane Handbook for Systematic Reviews of Interventions and the Preferred Reporting Items for Systematic Reviews and Meta-Analysis Protocol (PRISMA-P) statement guideline.<sup>15</sup>

### Inclusion criteria for study selection

#### Types of studies

All studies designed as randomized controlled trials (RCTs) will be included. The current clinical trial results will be objectively integrated, which is conducive to the

1  
2  
3  
4 evaluation of the efficacy of IVL on postoperative outcomes in patients undergoing  
5 resection of colorectal cancer. Exclusion criteria comprised paediatric patients, non-  
6 colorectal or emergency procedures, non-RCT methodology, and lack of any relevant  
7 clinical outcome measures. We will also exclude reviews, qualitative studies, animal  
8 trials and laboratory studies. Studies that included more than two study arms, but had  
9 IVL and placebo groups, were included and only those groups pertinent to this meta-  
10 analysis were considered.  
11  
12  
13  
14  
15  
16

### 17 **Types of patients**

18 Patients scheduled for resection of colorectal cancer will be included in this study.

19 Other restrictions included age ( $\geq 18$  years old) and American Society of  
20 Anesthesiologists' (ASA) physical status (I - III).  
21  
22  
23  
24

### 25 **Types of interventions**

26 Perioperative intravenous lidocaine is administrated as the intervention. Normal saline  
27 (NS) as placebo or no intervention could be administrated in the control groups. No  
28 consideration was given to how long the lidocaine infusion was continued after  
29 surgery, but to be eligible for inclusion, the infusion had to commence before the  
30 surgical incision.  
31  
32  
33  
34  
35  
36

### 37 **Types of outcome measures**

#### 38 **Primary outcomes**

39 The primary outcome variable are long-term survival outcome as reported and defined  
40 by the original studies, the occurrence of tumor recurrence or metastasis, and the  
41 restoration of intestinal function, including the time until first postoperative flatus and  
42 defecation. Flatus and defecation are important indications for exclusion of intestinal  
43 obstruction and restoration of intestinal function postoperatively.<sup>16</sup>  
44  
45  
46  
47  
48  
49

#### 50 **Secondary outcomes**

51 The secondary outcome variables include the severity of pain measured using VAS on  
52 postoperative days at 4, 12, 24, and 48 hours after surgery, the incidence of PONV,  
53 and the LOS.  
54  
55  
56  
57

#### 58 **Search methods for the identification of studies**

## Electronic searches

Six electric databases (PubMed, Embase, Web of Science, CNKI, SinoMed and WanFang Data) will be searched without language restriction to identify RCTs published before August 2021. A search strategy has been developed for the 6 databases as a combination of “Colonic Neoplasms”, “Rectal Neoplasms”, or “Colorectal Neoplasms” in all fields and “lidocaine” or “lignocaine” in all fields and “Infusions” or “Intravenous” in all fields and “Randomized Controlled Trial” or “RCT” in all fields. The reference lists will be searched manually for potentially relevant articles.

The search strategy for PubMed is described in Supplementary table 1, which will include all search terms, and other searches will be carried out based on those results. This will be suitably adapted to search in the other databases. There are no limits on language and publication status.

## Searching other resources

We will also search PROSPERO, the International Clinical Trials Registry Platform, ClinicalTrials.gov, dissertations, and grey literature to identify systematic reviews or clinical trials related to IVL. Manual searches will be conducted for related journals and conference processes.

## Data collection and analysis

### Selection of studies

Two reviewers (JWT and ZXT) will screen the search results according to the title and abstract independently. After the full text is obtained, the two reviewer will screen the references for potentially relevant studies. Any discord will be resolved by discussion between the two authors and an arbiter (SGL). The selection procedure for the study will be summarized and shown in a PRISMA flow chart (Figure 1).

### Data extraction

Based on the inclusion criteria, a standard form of data collection will be produced prior to data extraction. The two reviewers (JWT and ZXT) will independently extract data on patient baseline demographics (age, sex, ASA physical status), operative

1  
2  
3  
4 variables and details of the lidocaine administration (dose, starting point,  
5 perioperative duration and any bolus dose administered) as well as the placebo. The  
6 studies included were stratified according to whether the patients underwent open or  
7 laparoscopic resection. If the data necessary for meta-analysis of continuous variables  
8 were not available, the corresponding author was approached to provide the raw data,  
9 and if a response was not received, the technique described by Hozo et al. was  
10 employed to estimate the mean and standard deviation from the median and  
11 interquartile range [IQR].<sup>17</sup> When the consensus on data extraction is not available  
12 through discussion, the third reviewer (SGL) will make a decision.  
13  
14

### 21 **Assessment of study quality**

22  
23 The Cochrane Collaborations tool will be used to assess selection bias, performance  
24 bias, attrition bias and reporting bias. Two reviewers (JWT and ZXT) will  
25 independently rate the quality of the RCTs and fulfill the items of risk of bias as low,  
26 high, or unclear. Any discrepancies between the two reviewers will be solved by a  
27 consulting group including two experts (WXD and SGL). The quality of evidence  
28 resulting from this systematic review was evaluated through the Grading of  
29 Recommendations Assessment, Development and Evaluation (GRADE), and the level  
30 of evidence will be classified as high, medium, low, or very low.<sup>18</sup>  
31  
32  
33  
34  
35  
36  
37  
38

### 39 **Statistical analyses and data synthesis**

40  
41 Review Manager, Version 5.4 will be used for data synthesis. The pooled effects of  
42 dichotomous outcomes will be analyzed as risk ratio (RR) using the Mantel-Haenszel  
43 (M-H) technique and 95% confidence intervals (CIs). The pooled effects of  
44 continuous outcomes will be analyzed using mean difference (MD) and 95% CI. A *P*  
45 value of less than 0.05 will be considered to be statistically significant.  
46  
47  
48  
49

### 50 **Assessment of heterogeneity**

51  
52 *I*<sup>2</sup> statistic will be used to estimate statistical heterogeneity (*I*<sup>2</sup> ≤ 50% as low  
53 heterogeneity, *I*<sup>2</sup> > 50% as high heterogeneity). Clinical heterogeneity will be  
54 assessed by the 2 reviewers (JWT and ZXT) and the consulting group (WXD and  
55 SGL). If high clinical or statistical heterogeneity is observed, a random effect model  
56  
57  
58  
59  
60

1  
2  
3  
4 will be used. Otherwise, a fixed effect model will be chosen.  
5

### 6 **Assessment of publication bias**

7  
8 A funnel plot will be used to assess publication bias when ten or more RCTs are  
9  
10 available for quantitative analysis. Egger test will be performed if included studies are  
11  
12 less than ten.<sup>19</sup> For Egger's test, *p* value of greater than 0.05 was determined as no  
13  
14 significant publishing bias or small-study effects in studies. As funnel plot asymmetry  
15  
16 does not necessarily suggest reporting bias, we will attempt to recognize potential  
17  
18 causes for the asymmetry, including poor methodological quality and true  
19  
20 heterogeneity of studies.

### 21 **Subgroup and sensitivity analyses**

22  
23 On detection of heterogeneity, a subgroup analysis will be carried out to judge the  
24  
25 source of heterogeneity. The criteria for a subgroup analysis potentially include age,  
26  
27 type of surgery, and intervention dosage, frequency and duration. Considering the  
28  
29 significant difference in the degree of trauma between laparoscopic surgery and open  
30  
31 surgery, a subgroup analysis of surgical methods is necessary.<sup>20</sup>

32  
33 Sensitivity analysis will be performed to determine the robustness of aggregate  
34  
35 estimates and to detect whether any single study accounts for a substantial proportion  
36  
37 of heterogeneity by eliminating the included studies from the summary review one by  
38  
39 one. If low-quality articles are deleted, then a second meta-analysis will be carried  
40  
41 out. Comparison and discussion of the results and effect size of the two meta-analyses  
42  
43 will be held.<sup>21</sup>

### 44 **Trial sequential analysis**

45  
46 Assessment of the risk of random errors will be done by trial sequential analysis  
47  
48 (TSA). The results of TSA will determine whether the evidence in our meta-analysis  
49  
50 is reliable and conclusive by providing the boundaries of sample size.<sup>22</sup>

### 51 **Patient and public involvement**

52  
53 Patients and the public will not participate in the study. However, once scientific  
54  
55 publications disseminate our findings, they are circulated across social networks so  
56  
57 that our conclusions will potentially affect the actions of anesthesiologists and health  
58  
59  
60

1  
2  
3  
4 policymakers.

### 5 6 **Ethics and dissemination**

7  
8 Because the data used for this systematic review will be exclusively extracted from  
9  
10 published studies, ethical approval and informed consent of patients will not be  
11  
12 required. The systematic review will be published in a peer-reviewed journal,  
13  
14 presented at conferences and shared on social media platforms.  
15

### 16 17 18 **DISCUSSION**

19  
20 There has been increasing interest and evidence in the potential for IVL infusion in  
21  
22 patients undergoing colorectal surgery. Greenwood E et al.<sup>23</sup> considered that there is a  
23  
24 wide safe range of plasma concentrations by monitoring the plasma concentration of  
25  
26 lidocaine at different time points, which provides some evidence of the safety of  
27  
28 continuous intravenous infusion of lidocaine.

29  
30 A Cochrane review analyzed a total of 68 RCTs across various surgical specialties  
31  
32 and demonstrated an unclear effect of IVL versus placebo on pain scores, recovery of  
33  
34 gastrointestinal function, postoperative nausea and overall opioid requirement.<sup>24</sup>  
35  
36 Specific to the field of colorectal surgery, a recently published meta-analysis within  
37  
38 colorectal surgery provides support for the administration of perioperative IVL in  
39  
40 terms of earlier return of gastrointestinal function, lower postoperative pain scores and  
41  
42 reduced hospital LOS,<sup>25</sup> with no difference in complication rates or apparent issues  
43  
44 surrounding local anaesthetic toxicity. Another systematic review examined the role  
45  
46 of IVL in the setting of elective colorectal surgery and concluded that IVL provided  
47  
48 limited benefit in the reduction of early postoperative pain and morphine requirement  
49  
50 when compared with placebo.<sup>26</sup> Thus, a comprehensive systematic review and meta-  
51  
52 analysis including new trials were warranted.

53  
54 The underlying mechanisms of IVL might be multifactorial. Lidocaine has been  
55  
56 shown to have anti-inflammatory, analgesic and opioid-sparing properties,<sup>27, 28</sup> which  
57  
58 can improve the restoration of intestinal function, relieve pain, reduce the incidence of  
59  
60 PONV and shorten the LOS in patients undergoing resection of colorectal cancer.

1  
2  
3  
4 Furthermore, lidocaine has a prominent anti-growth and anti-metastatic effects on  
5 multiple cancer cells,<sup>7, 8</sup> Thus, IVL may have the potential to suppress the tumor  
6 recurrence or metastasis and improve the survival rate of colorectal cancer patients.  
7  
8 However, previous meta-analyses showed very different results. Meanwhile, systemic  
9 reviews or meta-analyses focused on the patients with colorectal cancer and anti-  
10 tumor effect of lidocaine seem to be absent. With the updated RCTs, the results of this  
11 meta-analysis will provide the most timely and comprehensive evidence on the  
12 efficacy of IVL in patients undergoing resection of colorectal cancer.  
13  
14  
15  
16  
17  
18  
19  
20

21 **Author contributions** BLL and JWT designed the study. BLL and BJJ were the  
22 principal investigator and guarantor. JWT, ZXT and SGL were the main coordinators  
23 of the study. JWT, ZXT, SGL, WXD and LJ conducted the study. SGL and BLL  
24 provided statistical and epidemiological support. JWT wrote the article with the  
25 support of BLL and ZXT. All the authors revised and approved the final version of  
26 the manuscript.  
27  
28  
29  
30  
31  
32

33 **Author affiliations** Faculty of Anesthesiology, Changhai Hospital, Naval Medical  
34 University, Shanghai 200433, China.  
35  
36

37 **Data statement** No additional data are available.  
38

39 **Acknowledgements** We would like to thank the primary authors and sponsors  
40 that have provided access to their trial's database.  
41  
42

43 **Funding** The authors acknowledged the support from 234 Climbing the Discipline  
44 Program of the first affiliated hospital of Naval Medical University (2020YXK053),  
45 and Shanghai Science and Technology Committee Rising-Star Program  
46 (19QA1408500).  
47  
48  
49

50 **Competing interests** None declared.  
51

52 **Patient consent for publication** Not required.  
53

54 **Provenance and peer review** Not commissioned; externally peer reviewed.  
55

56 **Open access** This is an open access article distributed in accordance with the  
57 Creative Commons Attribution Non Commercial (CC BY- NC 4.0) license, which  
58  
59  
60



permits others to distribute, remix, adapt, build upon this work non-commercially, and license their derivative works on different terms, provided the original work is properly cited, appropriate credit is given, any changes made indicated, and the use is non-commercial. See: <http://creativecommons.org/licenses/by-nc/4.0/>.

## ORCID ID

Wentao JI <https://orcid.org/0000-0002-6602-6313>

Lulong BO <https://orcid.org/0000-0001-6787-1837>

Figure 1 The PRISMA flow chart of the selection process. PRISMA, Preferred Reporting Items for Systematic Reviews and Meta-Analyses; RCT, randomised controlled trial.

## REFERENCES

- 1 Zhao JB, Li YL, Wang YM, et al. Intravenous lidocaine infusion for pain control after laparoscopic cholecystectomy: A meta-analysis of randomized controlled trials. *Medicine (Baltimore)* 2018;5:e9771.
- 2 Samimi S, Taheri A and Davari Tanha F. Comparison Between Intraperitoneal and Intravenous Lidocaine for Postoperative Analgesia After Elective Abdominal Hysterectomy, a Double-Blind Placebo Controlled Study. *J Family Reprod Health* 2015;4:193-8.
- 3 Dewinter G, Coppens S, Van de Velde M, et al. Quadratus Lumborum Block Versus Perioperative Intravenous Lidocaine for Postoperative Pain Control in Patients Undergoing Laparoscopic Colorectal Surgery: A Prospective, Randomized, Double-blind Controlled Clinical Trial. *Ann Surg* 2018;5:769-775.
- 4 Liu H, Dilger JP and Lin J. Effects of local anesthetics on cancer cells. *Pharmacol Ther* 2020;107558.
- 5 Li R, Xiao C, Liu H, et al. Effects of local anesthetics on breast cancer cell viability and migration. *BMC Cancer* 2018;1:666.
- 6 Liu H, Dilger JP and Lin J. Lidocaine Suppresses Viability and Migration of Human Breast Cancer Cells: TRPM7 as a Target for Some Breast Cancer Cell Lines. *Cancers (Basel)* 2021;2:
- 7 Sun H and Sun Y. Lidocaine inhibits proliferation and metastasis of lung cancer cell via regulation of miR-539/EGFR axis. *Artif Cells Nanomed Biotechnol* 2019;1:2866-2874.
- 8 Ye L, Zhang Y, Chen YJ, et al. Anti-tumor effects of lidocaine on human gastric cancer cells in vitro. *Bratisl Lek Listy* 2019;3:212-217.



- 1  
2  
3  
4 9 Dunn LK and Durieux ME. Perioperative Use of Intravenous Lidocaine. *Anesthesiology*  
5 2017;4:729-737.  
6  
7  
8 10 Cooke C, Kennedy ED, Foo I, et al. Meta-analysis of the effect of perioperative intravenous  
9 lidocaine on return of gastrointestinal function after colorectal surgery. *Tech Coloproctol* 2019;1:15-24.  
10  
11 11 Tikuišis R, Miliauskas P, Samalavičius NE, et al. Intravenous lidocaine for post-operative pain  
12 relief after hand-assisted laparoscopic colon surgery: a randomized, placebo-controlled clinical  
13 trial. *Tech Coloproctol* 2014;4:373-80.  
14  
15 12 Paterson HM. Continuous intravenous lidocaine infusion for postoperative pain and recovery in  
16 adults. *Tech Coloproctol* 2019;1:69-71.  
17  
18 13 Herzog J, Schou M, Jensen KM, et al. A randomised controlled trial of lidocaine infusion on post-  
19 operative opioid consumption in patients undergoing robotic colorectal surgery. *Dan Med J* 2020;1:  
20  
21 14 Stroup DF, Berlin JA, Morton SC, et al. Meta-analysis of observational studies in epidemiology: a  
22 proposal for reporting. Meta-analysis Of Observational Studies in Epidemiology (MOOSE)  
23 group. *Jama* 2000;15:2008-12.  
24  
25 15 Shamseer L, Moher D, Clarke M, et al. Preferred reporting items for systematic review and meta-  
26 analysis protocols (PRISMA-P) 2015: elaboration and explanation. *Bmj* 2015;g7647.  
27  
28 16 Buia A, Stockhausen F and Hanisch E. Laparoscopic surgery: A qualified systematic  
29 review. *World J Methodol* 2015;4:238-54.  
30  
31 17 Hozo SP, Djulbegovic B and Hozo I. Estimating the mean and variance from the median, range,  
32 and the size of a sample. *BMC Med Res Methodol* 2005;13.  
33  
34 18 Guyatt GH, Oxman AD, Schünemann HJ, et al. GRADE guidelines: a new series of articles in the  
35 Journal of Clinical Epidemiology. *J Clin Epidemiol* 2011;4:380-2.  
36  
37 19 Egger M, Davey Smith G, Schneider M, et al. Bias in meta-analysis detected by a simple,  
38 graphical test. *BMJ* 1997;7109:629-34.  
39  
40 20 Delaney CP, Marcello PW, Sonoda T, et al. Gastrointestinal recovery after laparoscopic  
41 colectomy: results of a prospective, observational, multicenter study. *Surg Endosc* 2010;3:653-61.  
42  
43 21 Han M, Nong L, Liu Z, et al. Safety and efficacy of mycophenolate mofetil in treating  
44 neuromyelitis optica spectrum disorders: a protocol for systematic review and meta-analysis. *BMJ Open*  
45 2020;11:e040371.  
46  
47 22 Wetterslev J, Thorlund K, Brok J, et al. Trial sequential analysis may establish when firm  
48  
49  
50  
51  
52  
53  
54  
55  
56  
57  
58  
59  
60

evidence is reached in cumulative meta-analysis. *J Clin Epidemiol* 2008;1:64-75.

23 Greenwood E, Nimmo S, Paterson H, et al. Intravenous lidocaine infusion as a component of multimodal analgesia for colorectal surgery-measurement of plasma levels. *Perioper Med (Lond)* 2019;1.

24 Weibel S, Jelting Y, Pace NL, et al. Continuous intravenous perioperative lidocaine infusion for postoperative pain and recovery in adults. *Cochrane Database Syst Rev* 2018;6:Cd009642.

25 Rollins KE, Javanmard-Emamghissi H, Scott MJ, et al. The impact of peri-operative intravenous lidocaine on postoperative outcome after elective colorectal surgery: A meta-analysis of randomised controlled trials. *Eur J Anaesthesiol* 2020;8:659-670.

26 MacFater WS, Rahiri JL, Lauti M, et al. Intravenous lignocaine in colorectal surgery: a systematic review. *ANZ J Surg* 2017;11:879-885.

27 Cui W, Li Y, Li S, et al. Systemic administration of lidocaine reduces morphine requirements and postoperative pain of patients undergoing thoracic surgery after propofol-remifentanyl-based anaesthesia. *Eur J Anaesthesiol* 2010;1:41-6.

28 Ortiz MP, Godoy MC, Schlosser RS, et al. Effect of endovenous lidocaine on analgesia and serum cytokines: double-blinded and randomized trial. *J Clin Anesth* 2016;70-77.

1  
2  
3  
4  
5  
6  
7  
8  
9  
10  
11  
12  
13  
14  
15  
16  
17  
18  
19  
20  
21  
22  
23  
24  
25  
26  
27  
28  
29  
30  
31  
32  
33  
34  
35  
36  
37  
38  
39  
40  
41  
42  
43  
44  
45  
46  
47  
48  
49  
50  
51  
52  
53  
54  
55  
56  
57  
58  
59  
60

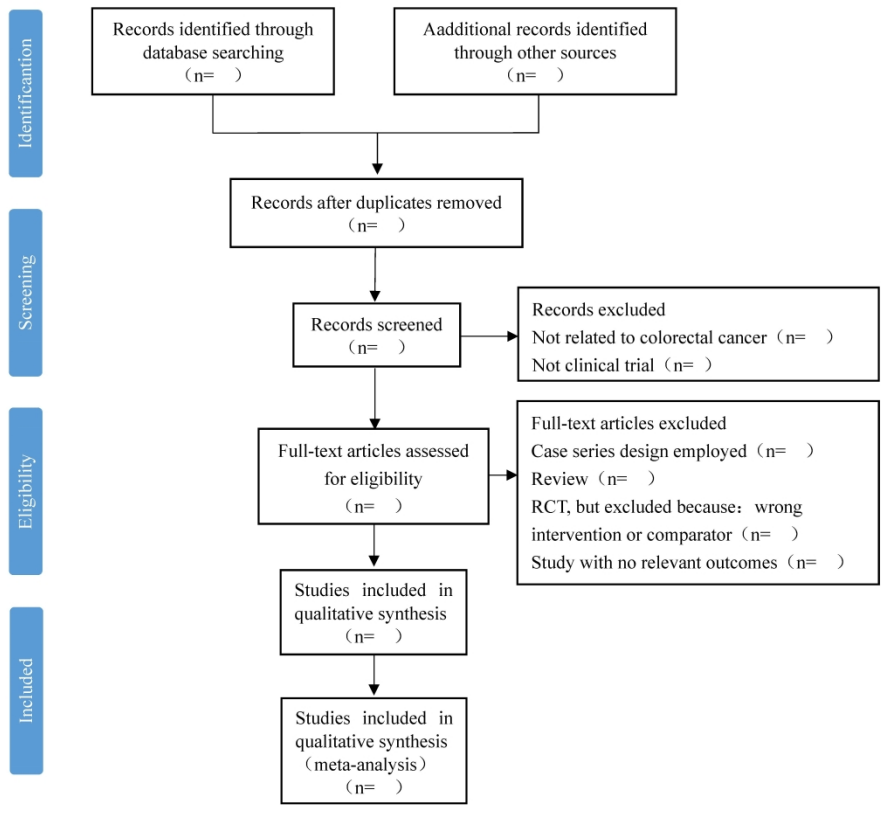

Figure 1 The PRISMA flow chart of the selection process. PRISMA, Preferred Reporting Items for Systematic Reviews and Meta-Analyses; RCT, randomised controlled trial.

1237x1259mm (96 x 96 DPI)

## Supplemental material

Supplemental Table 1 Search strategy used in PubMed database

| Number | Search terms                                                                                                                                         |
|--------|------------------------------------------------------------------------------------------------------------------------------------------------------|
| #1     | "Colonic Neoplasms"[Mesh]                                                                                                                            |
| #2     | "Rectal Neoplasms"[Mesh]                                                                                                                             |
| #3     | "Colorectal Neoplasms"[Mesh]                                                                                                                         |
| #4     | (colon[Title/Abstract]) OR (rectal[Title/Abstract]) OR (colorectal[Title/Abstract])<br>OR (proctectomy[Title/Abstract]) OR (colonic[Title/Abstract]) |
| #5     | #1 OR #2 OR #3 OR #4                                                                                                                                 |
| #6     | "Lidocaine"[Mesh]                                                                                                                                    |
| #7     | (lidocaine[Title/Abstract]) OR (lignocaine[Title/Abstract])                                                                                          |
| #8     | #6 OR #7                                                                                                                                             |
| #9     | "Infusions, Intravenous"[Mesh]                                                                                                                       |
| #10    | (intravenous) OR (infusion)                                                                                                                          |
| #11    | #9 OR #10                                                                                                                                            |
| #12    | "Randomized Controlled Trial" [Publication Type]                                                                                                     |
| #13    | (RCT) OR (randomized controlled trial)                                                                                                               |
| #14    | #12 OR #13                                                                                                                                           |
| #15    | #5 AND #8 AND #11 AND #14                                                                                                                            |

# Reporting checklist for protocol of a systematic review.

Based on the PRISMA-P guidelines.

## Instructions to authors

Complete this checklist by entering the page numbers from your manuscript where readers will find each of the items listed below.

Your article may not currently address all the items on the checklist. Please modify your text to include the missing information. If you are certain that an item does not apply, please write "n/a" and provide a short explanation.

Upload your completed checklist as an extra file when you submit to a journal.

In your methods section, say that you used the PRISMA-Preporting guidelines, and cite them as:

Moher D, Shamseer L, Clarke M, Ghersi D, Liberati A, Petticrew M, Shekelle P, Stewart LA. Preferred Reporting Items for Systematic Review and Meta-Analysis Protocols (PRISMA-P) 2015 statement. *Syst Rev.* 2015;4(1):1.

| Reporting Item      |                                                                                                                                                               | Page Number |
|---------------------|---------------------------------------------------------------------------------------------------------------------------------------------------------------|-------------|
| <b>Title</b>        |                                                                                                                                                               |             |
| Identification      | <a href="#">#1a</a> Identify the report as a protocol of a systematic review                                                                                  | 1           |
| Update              | <a href="#">#1b</a> If the protocol is for an update of a previous systematic review, identify as such                                                        | n/a         |
| <b>Registration</b> |                                                                                                                                                               |             |
|                     | <a href="#">#2</a> If registered, provide the name of the registry (such as PROSPERO) and registration number                                                 | 2           |
| <b>Authors</b>      |                                                                                                                                                               |             |
| Contact             | <a href="#">#3a</a> Provide name, institutional affiliation, e-mail address of all protocol authors; provide physical mailing address of corresponding author | 1           |
| Contribution        | <a href="#">#3b</a> Describe contributions of protocol authors and identify the guarantor of the review                                                       | 10          |

## Amendments

|    |                      |                                                                                               |     |
|----|----------------------|-----------------------------------------------------------------------------------------------|-----|
| 1  | <a href="#">#4</a>   | If the protocol represents an amendment of a previously completed or                          | n/a |
| 2  |                      | published protocol, identify as such and list changes; otherwise, state                       |     |
| 3  |                      | plan for documenting important protocol amendments                                            |     |
| 4  |                      |                                                                                               |     |
| 5  |                      |                                                                                               |     |
| 6  | <b>Support</b>       |                                                                                               |     |
| 7  |                      |                                                                                               |     |
| 8  | Sources              | <a href="#">#5a</a> Indicate sources of financial or other support for the review             | 10  |
| 9  |                      |                                                                                               |     |
| 10 | Sponsor              | <a href="#">#5b</a> Provide name for the review funder and / or sponsor                       | n/a |
| 11 |                      |                                                                                               |     |
| 12 | Role of sponsor or   | <a href="#">#5c</a> Describe roles of funder(s), sponsor(s), and / or institution(s), if any, | n/a |
| 13 | funder               | in developing the protocol                                                                    |     |
| 14 |                      |                                                                                               |     |
| 15 |                      |                                                                                               |     |
| 16 | <b>Introduction</b>  |                                                                                               |     |
| 17 |                      |                                                                                               |     |
| 18 | Rationale            | <a href="#">#6</a> Describe the rationale for the review in the context of what is already    | 3   |
| 19 |                      | known                                                                                         |     |
| 20 | Objectives           | <a href="#">#7</a> Provide an explicit statement of the question(s) the review will           | 3   |
| 21 |                      | address with reference to participants, interventions, comparators, and                       |     |
| 22 |                      | outcomes (PICO)                                                                               |     |
| 23 |                      |                                                                                               |     |
| 24 |                      |                                                                                               |     |
| 25 | <b>Methods</b>       |                                                                                               |     |
| 26 |                      |                                                                                               |     |
| 27 | Eligibility criteria | <a href="#">#8</a> Specify the study characteristics (such as PICO, study design, setting,    | 4-5 |
| 28 |                      | time frame) and report characteristics (such as years considered,                             |     |
| 29 |                      | language, publication status) to be used as criteria for eligibility for                      |     |
| 30 |                      | the review                                                                                    |     |
| 31 | Information sources  | <a href="#">#9</a> Describe all intended information sources (such as electronic              | 5-6 |
| 32 |                      | databases, contact with study authors, trial registers or other grey                          |     |
| 33 |                      | literature sources) with planned dates of coverage                                            |     |
| 34 |                      |                                                                                               |     |
| 35 | Search strategy      | <a href="#">#10</a> Present draft of search strategy to be used for at least one electronic   | 5-6 |
| 36 |                      | database, including planned limits, such that it could be repeated                            |     |
| 37 |                      |                                                                                               |     |
| 38 | Study records - data | <a href="#">#11a</a> Describe the mechanism(s) that will be used to manage records and        | 6   |
| 39 | management           | data throughout the review                                                                    |     |
| 40 |                      |                                                                                               |     |
| 41 | Study records -      | <a href="#">#11b</a> State the process that will be used for selecting studies (such as two   | 6   |
| 42 | selection process    | independent reviewers) through each phase of the review (that is,                             |     |
| 43 |                      | screening, eligibility and inclusion in meta-analysis)                                        |     |
| 44 |                      |                                                                                               |     |
| 45 | Study records - data | <a href="#">#11c</a> Describe planned method of extracting data from reports (such as         | 6-7 |
| 46 | collection process   | piloting forms, done independently, in duplicate), any processes for                          |     |
| 47 |                      |                                                                                               |     |
| 48 |                      |                                                                                               |     |
| 49 |                      |                                                                                               |     |
| 50 |                      |                                                                                               |     |
| 51 |                      |                                                                                               |     |
| 52 |                      |                                                                                               |     |
| 53 |                      |                                                                                               |     |
| 54 |                      |                                                                                               |     |
| 55 |                      |                                                                                               |     |
| 56 |                      |                                                                                               |     |
| 57 |                      |                                                                                               |     |
| 58 |                      |                                                                                               |     |
| 59 |                      |                                                                                               |     |
| 60 |                      |                                                                                               |     |

|    |                    |                                                                                           |     |
|----|--------------------|-------------------------------------------------------------------------------------------|-----|
|    |                    | obtaining and confirming data from investigators                                          |     |
| 1  |                    |                                                                                           |     |
| 2  |                    |                                                                                           |     |
| 3  | Data items         | <a href="#">#12</a> List and define all variables for which data will be sought (such as  | 4-5 |
| 4  |                    | PICO items, funding sources), any pre-planned data assumptions and                        |     |
| 5  |                    | simplifications                                                                           |     |
| 6  |                    |                                                                                           |     |
| 7  |                    |                                                                                           |     |
| 8  | Outcomes and       | <a href="#">#13</a> List and define all outcomes for which data will be sought, including | 4-5 |
| 9  | prioritization     | prioritization of main and additional outcomes, with rationale                            |     |
| 10 |                    |                                                                                           |     |
| 11 |                    |                                                                                           |     |
| 12 | Risk of bias in    | <a href="#">#14</a> Describe anticipated methods for assessing risk of bias of individual | 8   |
| 13 | individual studies | studies, including whether this will be done at the outcome or study                      |     |
| 14 |                    | level, or both; state how this information will be used in data synthesis                 |     |
| 15 |                    |                                                                                           |     |
| 16 |                    |                                                                                           |     |
| 17 | Data synthesis     | <a href="#">#15a</a> Describe criteria under which study data will be quantitatively      | 7   |
| 18 |                    | synthesised                                                                               |     |
| 19 |                    |                                                                                           |     |
| 20 |                    |                                                                                           |     |
| 21 | Data synthesis     | <a href="#">#15b</a> If data are appropriate for quantitative synthesis, describe planned | 7   |
| 22 |                    | summary measures, methods of handling data and methods of                                 |     |
| 23 |                    | combining data from studies, including any planned exploration of                         |     |
| 24 |                    | consistency (such as I <sup>2</sup> , Kendall's $\tau$ )                                  |     |
| 25 |                    |                                                                                           |     |
| 26 |                    |                                                                                           |     |
| 27 |                    |                                                                                           |     |
| 28 | Data synthesis     | <a href="#">#15c</a> Describe any proposed additional analyses (such as sensitivity or    | 8   |
| 29 |                    | subgroup analyses, meta-regression)                                                       |     |
| 30 |                    |                                                                                           |     |
| 31 | Data synthesis     | <a href="#">#15d</a> If quantitative synthesis is not appropriate, describe the type of   | n/a |
| 32 |                    | summary planned                                                                           |     |
| 33 |                    |                                                                                           |     |
| 34 |                    |                                                                                           |     |
| 35 | Meta-bias(es)      | <a href="#">#16</a> Specify any planned assessment of meta-bias(es) (such as publication  | 8   |
| 36 |                    | bias across studies, selective reporting within studies)                                  |     |
| 37 |                    |                                                                                           |     |
| 38 |                    |                                                                                           |     |
| 39 | Confidence in      | <a href="#">#17</a> Describe how the strength of the body of evidence will be assessed    | 7   |
| 40 | cumulative         | (such as GRADE)                                                                           |     |
| 41 | evidence           |                                                                                           |     |
| 42 |                    |                                                                                           |     |
| 43 |                    |                                                                                           |     |

The PRISMA-P checklist is distributed under the terms of the Creative Commons Attribution License CC-BY 4.0. This checklist was completed on 06. January 2021 using <https://www.goodreports.org/>, a tool made by the [EQUATOR Network](#) in collaboration with [Penelope.ai](#)
