# Supplementary material for: Effect of perioperative intravenous lidocaine on postoperative outcomes in patients undergoing resection of colorectal cancer: a protocol for systematic review and meta-analysis
Source: PubMed Central journal article supplement — BMJ Open. 2021 Aug 23;11(8):e048803. doi: 10.1136/bmjopen-2021-048803 (PMC8383864; doi:10.1136/bmjopen-2021-048803), 2021-08-23
Supplement: bmjopen-2021-048803supp001.pdf [file bmjopen-2021-048803supp001.pdf]

## Supplemental material

Supplemental Table 1 Search strategy used in PubMed database

| Number | Search terms                                                                                                                                         |
|--------|------------------------------------------------------------------------------------------------------------------------------------------------------|
| #1     | "Colonic Neoplasms"[Mesh]                                                                                                                            |
| #2     | "Rectal Neoplasms"[Mesh]                                                                                                                             |
| #3     | "Colorectal Neoplasms"[Mesh]                                                                                                                         |
| #4     | (colon[Title/Abstract]) OR (rectal[Title/Abstract]) OR (colorectal[Title/Abstract])<br>OR (proctectomy[Title/Abstract]) OR (colonic[Title/Abstract]) |
| #5     | #1 OR #2 OR #3 OR #4                                                                                                                                 |
| #6     | "Lidocaine"[Mesh]                                                                                                                                    |
| #7     | (lidocaine[Title/Abstract]) OR (lignocaine[Title/Abstract])                                                                                          |
| #8     | #6 OR #7                                                                                                                                             |
| #9     | "Infusions, Intravenous"[Mesh]                                                                                                                       |
| #10    | (intravenous) OR (infusion)                                                                                                                          |
| #11    | #9 OR #10                                                                                                                                            |
| #12    | "Randomized Controlled Trial" [Publication Type]                                                                                                     |
| #13    | (RCT) OR (randomized controlled trial)                                                                                                               |
| #14    | #12 OR #13                                                                                                                                           |
| #15    | #5 AND #8 AND #11 AND #14                                                                                                                            |
